# Supplementary material for: Emergence of microbial diversity due to cross-feeding interactions in a spatial model of gut microbial metabolism
Source: PubMed Central journal article supplement (PMC5434578; doi:10.1186/s12918-017-0430-4), 2017-05-16

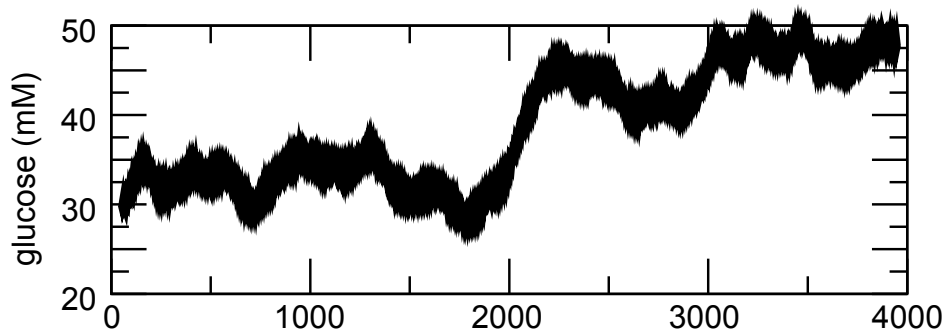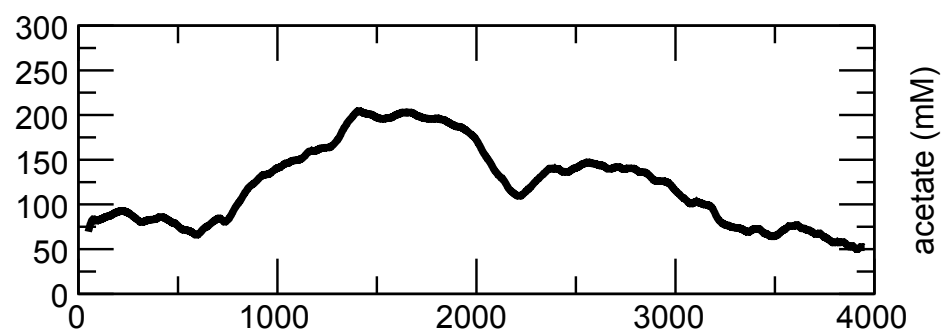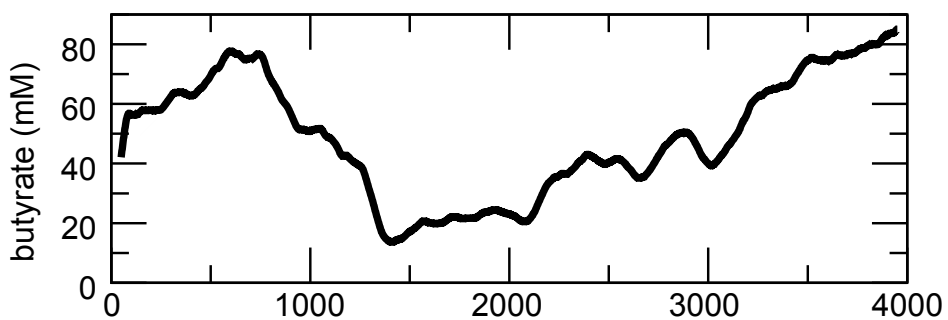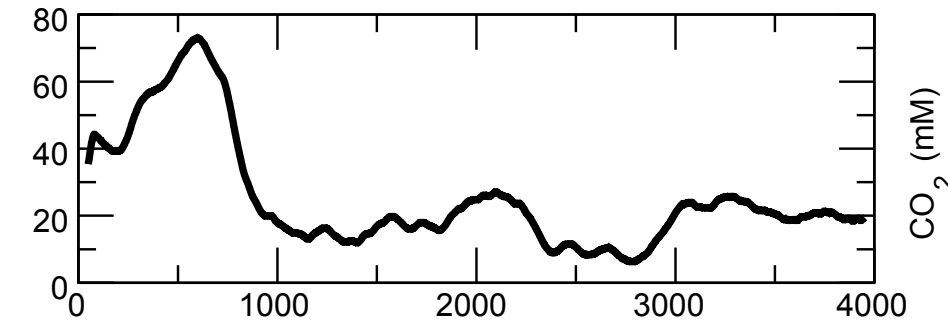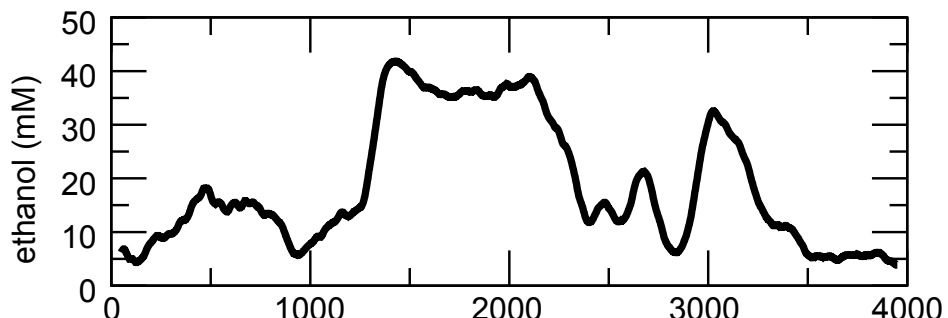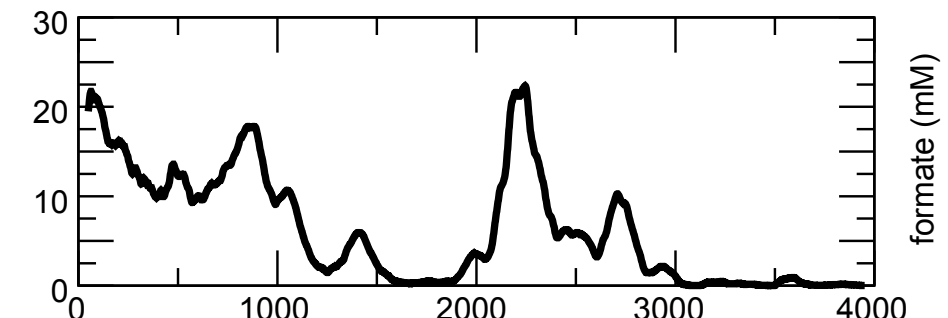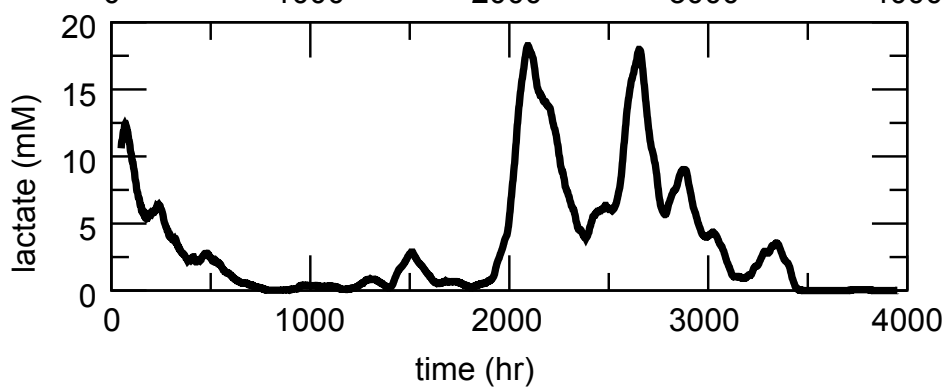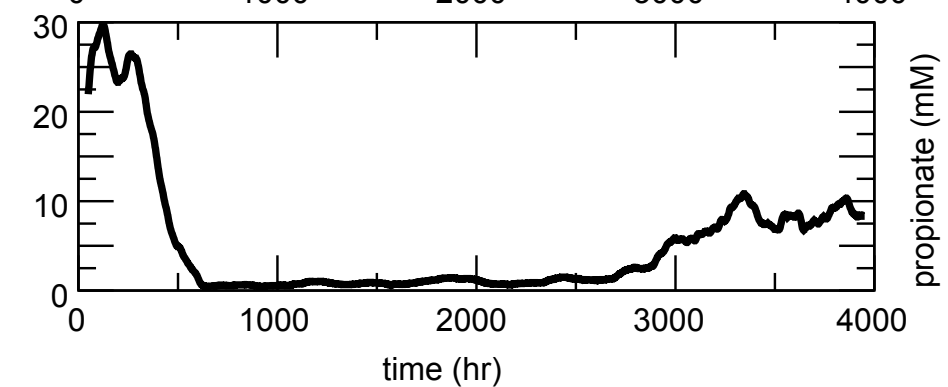

Supplement: 12918_2017_430_MOESM4_ESM.pdf [file 12918_2017_430_MOESM4_ESM.pdf]
